# Supplementary material
Source: Springer Nature journal article supplement (https://www.springermedizin.de/resource/supplementary/13002_2010_196_MOESM3_ESM.pdf/9627360)

■ Climber ■ Herb ■ Shrub ■ Tree

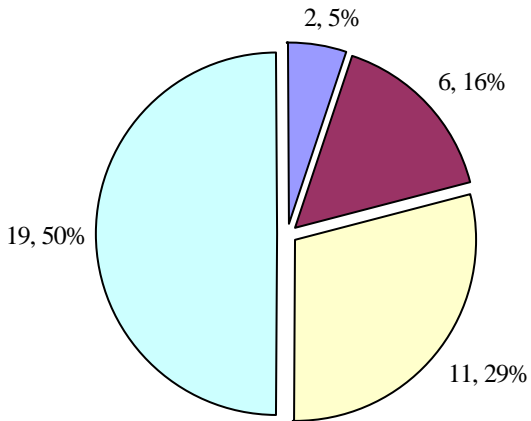

Supplement: MOESM3 [file 9627360]
